# Supplementary material for: Comparison of volatile compounds among different types of Tieguanyin oolong tea using DHI-GC-MS
Source: Royal Society of Chemistry journal article supplement (doi:10.1039/d4ay02042a), 2025-01-01
Supplement: d4ay02042a1.pdf [file d4ay02042a1.pdf]

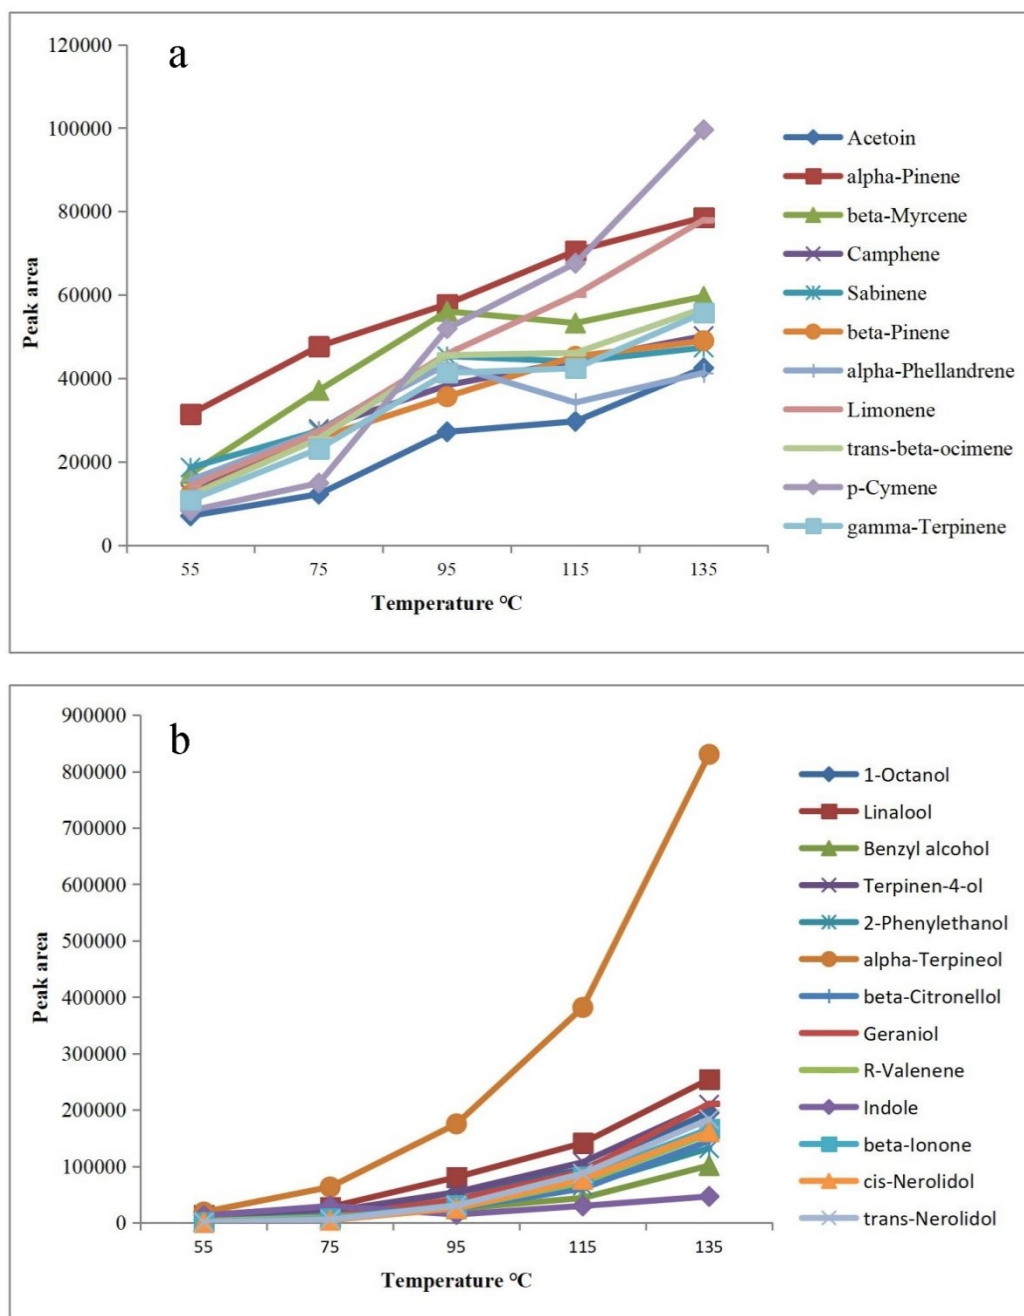

Fig. S1 Change trends of peak areas of 24 standardsextracted by HS-20 with different temperature.a: acetoin,alpha-pinene,beta-myrcene,camphene,sabinene,beta-pinene,alpha-phellandrene,limonene,trans-beta-ocimene,p-cymene,gamma-terpinene; b: 1-octanol, linalool, benzyl alcohol, terpinen-4-ol, 2-phenylethanol, alpha-terpineol, beta-citronellol, geraniol, R-valenene, indole, beta-ionone, cis-nerolidol, trans-nerolidol.
