# Supplementary material for: Comparison of volatile compounds among different types of Tieguanyin oolong tea using DHI-GC-MS
Source: Royal Society of Chemistry journal article supplement (doi:10.1039/d4ay02042a), 2025-01-01
Supplement: d4ay02042a2.pdf [file d4ay02042a2.pdf]

Table S1. Contents of 33 commonvolatiles in TGY.

| No. | Compound                 | Category              | Relative peak area (%) |            |            |
|-----|--------------------------|-----------------------|------------------------|------------|------------|
|     |                          |                       | LFT                    | HFT        | SFT        |
| 1   | Ethanol                  | alcohols              | 10.59±4.17             | 7.54±2.31  | 6.05±2.58  |
| 2   | 1-Penten-3-ol            | alcohols              | 6.03±3.40              | 7.71±2.23  | 7.59±1.30  |
| 3   | 1-Pentanol               | alcohols              | 1.06±0.12              | 1.12±0.35  | 2.21±0.95  |
| 4   | Z-2-Penten-1-ol          | alcohols              | 2.30±1.05              | 2.19±0.77  | 2.25±0.68  |
| 5   | Linalool                 | alcohols              | 0.43±0.22              | 0.27±0.15  | 0.26±0.17  |
| 6   | 2,6-Dimethylcyclohexanol | alcohols              | 1.03±0.62              | 0.72±0.28  | 0.78±0.38  |
| 7   | Hotrienol                | alcohols              | 0.53±0.13              | 0.77±0.28  | 0.82±0.42  |
| 8   | Trans-Linalool           | alcohols              | 0.29±0.09              | 0.33±0.15  | 0.31±0.16  |
| 9   | Phenethyl alcohol        | alcohols              | 1.03±0.24              | 0.62±0.26  | 0.91±0.37  |
| 10  | E-nerolidol              | alcohols              | 15.26±6.72             | 10.02±8.10 | 2.52±1.71  |
| 11  | Benzyl nitrile           | nitrogenous compounds | 0.29±0.10              | 0.29±0.11  | 0.52±0.32  |
| 12  | Butanal                  | aldehydes             | 1.29±0.47              | 1.04±0.50  | 0.41±0.17  |
| 13  | Pentanal                 | aldehydes             | 6.47±1.50              | 5.12±0.55  | 2.48±0.76  |
| 14  | Hexanal                  | aldehydes             | 5.29±2.10              | 5.79±3.45  | 2.81±1.75  |
| 15  | Trans-2-Pentenal         | aldehydes             | 1.91±0.74              | 1.93±1.02  | 1.16±0.52  |
| 16  | 2-Hexenal                | aldehydes             | 0.85±0.42              | 0.60±0.21  | 0.38±0.19  |
| 17  | E,E-2,4-Heptadienal      | aldehydes             | 2.31±1.05              | 1.22±0.48  | 0.48±0.20  |
| 18  | Benzaldehyde             | aldehydes             | 1.51±0.73              | 1.04±0.48  | 1.08±0.32  |
| 19  | Epoxy-2-decenal          | aldehydes             | 0.59±0.25              | 0.88±0.60  | 0.37±0.13  |
| 20  | Acetic acid              | acids                 | 3.69±1.22              | 13.15±6.46 | 21.86±5.87 |
| 21  | Propanoic acid           | acids                 | 0.36±0.12              | 0.85±0.48  | 3.65±1.99  |
| 22  | Isobutyric acid          | acids                 | 0.11±0.04              | 0.27±0.12  | 0.72±0.29  |
| 23  | Pivalic acid             | acids                 | 0.21±0.03              | 0.27±0.13  | 0.20±0.05  |
| 24  | Isovaleric acid          | acids                 | 0.34±0.07              | 0.24±0.05  | 0.81±0.24  |
| 25  | Pentanoic acid           | acids                 | 0.36±0.11              | 0.47±0.28  | 1.13±0.39  |
| 26  | Hexanoic acid            | acids                 | 0.98±0.17              | 1.38±0.93  | 3.93±0.78  |
| 27  | Hexanon                  | ketones               | 0.40±0.13              | 0.56±0.14  | 0.69±0.16  |
| 28  | 6-methyl-5-Hepten-2-one  | ketones               | 3.36±1.03              | 3.68±1.67  | 1.34±0.30  |
| 29  | Geranyl acetone          | ketones               | 0.33±0.17              | 0.35±0.07  | 0.54±0.21  |
| 30  | Beta-Ionone              | ketones               | 0.92±0.46              | 0.91±0.14  | 0.84±0.69  |
| 31  | Dihydroactinidiolide     | ketones               | 0.48±0.36              | 0.59±0.29  | 1.99±2.34  |
| 32  | Beta-pinene              | alkenes               | 0.17±0.02              | 0.22±0.06  | 0.32±0.15  |
| 33  | Toluene                  | alkenes               | 0.44±0.12              | 0.83±0.26  | 0.46±0.11  |

Data are means (±SD) of four replicates.

“-”meansthe compounds was not detected in tea samples.

Table S2.Contents ofvolatile compounds in TGY with VIP value larger than 1.

| No. | Compound                      | VIP | Relative peak area (%) |           |           |
|-----|-------------------------------|-----|------------------------|-----------|-----------|
|     |                               |     | LFT                    | HFT       | SFT       |
| 1   | Isovaleric acid               | 1.9 | 0.34±0.07              | 0.24±0.05 | 0.81±0.24 |
| 2   | 2,2,6-Trimethyl-cyclohexanone | 1.9 | -                      | -         | 0.21±0.07 |

|    |                                                       |     |           |           |           |
|----|-------------------------------------------------------|-----|-----------|-----------|-----------|
| 3  | 1-Octanol                                             | 1.8 | -         | -         | 0.19±0.07 |
| 4  | Heptanoic acid                                        | 1.8 | -         | 0.05±0.10 | 0.40±0.06 |
| 5  | Hexanoic acid                                         | 1.7 | 0.98±0.17 | 1.38±0.93 | 3.93±0.78 |
| 6  | Ethylmethylemaleimide                                 | 1.7 | -         | -         | 0.20±0.12 |
| 7  | 1-(4-tert-Butylphenyl) propan-2-one                   | 1.7 | -         | 0.31±0.09 | 0.07±0.07 |
| 8  | E-3-Hexenoic acid                                     | 1.6 | -         | -         | 0.26±0.16 |
| 9  | 2-Methyl-butanenitrile                                | 1.6 | 0.07±0.12 | -         | 0.32±0.21 |
| 10 | Trans-2-octenal                                       | 1.6 | 0.25±0.06 | 0.28±0.14 | 0.05±0.09 |
| 11 | p-Xylene                                              | 1.5 | 0.22±0.19 | 0.54±0.28 | 0.09±0.16 |
| 12 | Octanoic acid                                         | 1.5 | 0.06±0.07 | -         | 0.15±0.11 |
| 13 | Pivalic acid vinyl ester                              | 1.5 | 0.04±0.08 | -         | 0.16±0.11 |
| 14 | 6-methyl-5-Hepten-2-one                               | 1.5 | 3.36±1.03 | 3.68±1.67 | 1.34±0.30 |
| 15 | Butanoic acid                                         | 1.5 | 0.01±0.04 | 0.12±0.13 | 0.66±0.35 |
| 16 | 1-Hexanol                                             | 1.5 | -         | -         | 0.17±0.13 |
| 17 | Pentanoic acid                                        | 1.5 | 0.36±0.11 | 0.47±0.28 | 1.13±0.39 |
| 18 | Propanoic acid                                        | 1.5 | 0.36±0.12 | 0.85±0.48 | 3.65±1.99 |
| 19 | Isobutenyl methyl ketone                              | 1.5 | -         | 0.15±0.16 | 0.58±0.21 |
| 20 | Toluene                                               | 1.5 | 0.44±0.12 | 0.83±0.26 | 0.46±0.11 |
| 21 | Formic acid                                           | 1.5 | 0.13±0.09 | 0.30±0.23 | 1.33±0.74 |
| 22 | 1-Butanol                                             | 1.5 | 0.05±0.05 | 0.14±0.10 | 0.48±0.23 |
| 23 | Hexahydrofarnesyl acetone                             | 1.4 | 0.04±0.08 | 0.04±0.08 | 0.32±0.22 |
| 24 | Isobutyric acid                                       | 1.4 | 0.11±0.04 | 0.27±0.12 | 0.72±0.29 |
| 25 | 1-Ethyl-2-formylpyrrole                               | 1.4 | -         | 0.13±0.09 | 0.60±0.37 |
| 26 | 1-Pentanol                                            | 1.4 | 1.06±0.12 | 1.12±0.35 | 2.21±0.95 |
| 27 | Pentanal                                              | 1.3 | 6.47±1.50 | 5.12±0.55 | 2.48±0.76 |
| 28 | Z,Z-2,4-Heptadienal                                   | 1.2 | 1.76±0.86 | 2.22±2.44 | 0.11±0.20 |
| 29 | Epoxy-2-decenal                                       | 1.2 | 0.59±0.25 | 0.88±0.60 | 0.37±0.13 |
| 30 | Methyl 2-Methylpentanoate                             | 1.2 | 0.31±0.13 | 0.26±0.19 | 0.03±0.06 |
| 31 | 2,6-Dimethyl-3,7-octadiene-2,6-diol                   | 1.2 | 0.40±0.22 | 0.04±0.08 | 0.47±0.49 |
| 32 | Nonanoic acid                                         | 1.2 | 0.02±0.06 | -         | 0.15±0.18 |
| 33 | Z-4-Heptenal                                          | 1.2 | 1.01±0.48 | 0.76±0.52 | 0.07±0.13 |
| 34 | Penten-3-one                                          | 1.2 | 2.53±1.16 | 1.99±1.41 | 0.29±0.42 |
| 35 | Butanal                                               | 1.2 | 1.29±0.47 | 1.04±0.50 | 0.41±0.17 |
| 36 | Trans-2-decenal                                       | 1.1 | 0.08±0.06 | 0.03±0.05 | 0.17±0.18 |
| 37 | Dihydrolinalool                                       | 1.1 | 0.07±0.08 | 0.08±0.08 | 0.20±0.15 |
| 38 | 1-(2-Furanyl)-ethanone                                | 1.1 | -         | 0.05±0.10 | 0.21±0.16 |
| 39 | Phenethylisobutyrate                                  | 1.1 | 0.01±0.04 | 0.13±0.08 | 0.30±0.18 |
| 40 | 2-Butanone                                            | 1.1 | -         | 0.57±0.50 | 1.62±1.05 |
| 41 | 4-Oxoisophorone                                       | 1.1 | -         | 0.03±0.05 | 0.10±0.07 |
| 42 | Acetylpropionyl                                       | 1.1 | -         | 0.23±0.18 | 0.08±0.08 |
| 43 | 3R,6R-2,2,6-Trimethyl-6-vinyltetrahydro-2H-pyran-3-ol | 1.1 | 0.02±0.06 | -         | 0.08±0.10 |
| 44 | Hexanal                                               | 1.1 | 5.29±2.10 | 5.79±3.45 | 2.81±1.75 |
| 45 | Geranyl acetone                                       | 1.0 | 0.33±0.17 | 0.35±0.07 | 0.54±0.21 |
| 46 | E-2-heptenal                                          | 1.0 | 0.23±0.05 | 0.28±0.09 | 0.15±0.16 |

|    |                 |     |            |            |            |
|----|-----------------|-----|------------|------------|------------|
| 47 | Benzyl nitrile  | 1.0 | 0.29±0.10  | 0.29±0.11  | 0.52±0.32  |
| 48 | Dihydrolinalool | 1.0 | 0.07±0.08  | 0.08±0.08  | 0.20±0.15  |
| 49 | Divinylcarbinol | 1.0 | 0.14±0.15  | 0.21±0.29  | -          |
| 50 | 3-Hexenal       | 1.0 | 0.10±0.10  | 0.11±0.13  | -          |
| 51 | Acetic acid     | 1.0 | 3.69±1.22  | 13.15±6.46 | 21.86±5.87 |
| 52 | E-nerolidol     | 0.9 | 15.26±6.72 | 10.02±8.10 | 2.52±1.71  |

Data are means (±SD) of four replicates.

“-” means the compounds was not detected in tea samples.

Table S3. Contents of volatile compounds in matrix spiking samples (20 ng/mL) extracted by DHI and SPME approach.

| Compound        | Relative peak area (%) |       |
|-----------------|------------------------|-------|
|                 | DHI                    | SPME  |
| Acetoin         | 1.34                   | 0.03  |
| α-Pinene        | 4.33                   | 0.48  |
| Camphene        | 3.53                   | 0.33  |
| Sabinene        | 5.67                   | 0.66  |
| β-Pinene        | 4.60                   | 0.48  |
| β-Myrcene       | 6.59                   | 0.66  |
| α-Phellandrene  | 5.79                   | 0.79  |
| β-ocimene       | 5.79                   | 1.02  |
| R-Limonene      | 5.20                   | 1.73  |
| p-Cymene        | 2.92                   | 2.11  |
| γ-Terpinene     | 5.41                   | 1.33  |
| 1-Octanol       | 5.20                   | 7.12  |
| Linalool        | 4.34                   | 6.16  |
| Benzyl alcohol  | 2.38                   | 3.79  |
| S-Terpinen-4-ol | 4.60                   | 4.74  |
| 2-Phenylethanol | 3.44                   | 4.57  |
| α-Terpineol     | 4.07                   | 4.33  |
| S-β-Citronellol | 2.56                   | 5.17  |
| Geraniol        | 4.10                   | 7.08  |
| Indole          | 2.05                   | 5.60  |
| β-Ionone        | 4.76                   | 18.25 |
| Valencene       | 4.05                   | 17.67 |
| Nerolidol       | 3.42                   | 3.00  |
| E-nerolidol     | 3.87                   | 2.90  |
